# Supplementary material
Source: Research Square preprint supplement (doi:10.21203/rs.3.rs-10098444/v1)

*Supporting Information for*

**Co-application of plants and sludge enhances soil aggregation and mitigates heavy metal risks in rare earth mine soil**

**Supporting information for method**

*1. Carbon fractions analysis*

Soil carbon fractions, including light-fraction organic carbon (LFOC), particulate organic carbon (POC) and mineral-associated organic carbon (MAOC), were separated by density fractionation and particle-size separation, based on physical fractionation approaches for soil organic matter (Cambardella and Elliott, 1992; Sollins et al., 1996). Briefly, 10 g soil or aggregate sample was mixed with 40 mL ZnBr2 solution (1.85 g·cm-3), inverted 10 times and centrifuged at 3500 rpm for 5 min. The supernatant was filtered through a 0.45 μm membrane and used to determine LFOC. The remaining sediment was dispersed with 40 mL 0.5 mol·L-1 sodium hexametaphosphate, shaken at 110 rpm for 18 h and passed through a 0.053 mm sieve. The fraction retained on the sieve was used to determine POC, while the fraction passing through the sieve was used to determine MAOC. Carbon contents in each fraction were determined using the dichromate oxidation method. Bulk-soil carbon fraction data are shown in Table S4.

*2. Enzyme activities analysis*

Soil extracellular enzyme activities, including β-glucosidase (BG), cellobiohydrolase (CBH), β-N-acetylglucosaminidase (NAG) and polyphenol oxidase (PPO), were measured using microplate-based fluorometric or colorimetric assays (German et al., 2011; Saiya-Cork et al., 2002). Hydrolase activities were determined using MUB-linked substrates after incubation at 25°C for 4 h, with excitation at 365 nm and emission at 450 nm. PPO activity was determined using L-DOPA as the substrate with H2O2 addition and measured at 450 nm after incubation at 25°C for 24 h. Detailed enzyme activity data are shown in Fig. S1.

*3. Plant biomass and root morphological traits analyses*

Plant shoots and roots were dried to constant weight and weighed to determine biomass. Root morphological traits were measured using a root scanner (EPSON, Japan) and WinRHIZO image analysis software (Regent Instruments, Canada). The measured root traits included root length (RL), root surface area (RS), root volume (RV) and root diameter (RD). For mixed planting treatments, RL, RS and RV were summed across species within each pot, and RD was expressed as the mean root diameter of the pooled root system. Detailed root morphological data are shown in Table S6.

*4. Heavy metal analysis and ecological risk assessment*

Total soil Cu, Zn and Ni were determined after acid digestion with HF-HNO3-HClO4. Plant samples were oven-dried, ground, digested with HNO3-HClO4 and analyzed for Cu, Zn and Ni using ICP-OES. Heavy metal transfer and accumulation in plants were evaluated using the translocation factor (TF) and bioconcentration factor (BCF). The potential ecological risk index (RI) was calculated according to Håkanson (1980) using regional background values for Meizhou.

**References**

Cambardella, C.A., Elliott, E.T., 1992. Particulate soil organic-matter changes across a grassland cultivation sequence. Soil Sci. Soc. Am. J. 56, 777-783. https://doi.org/10.2136/sssaj1992.03615995005600030017x

Sollins, P., Homann, P., Caldwell, B.A., 1996. Stabilization and destabilization of soil organic matter: mechanisms and controls. Geoderma 74, 65-105. https://doi.org/10.1016/S0016-7061(96)00036-5

German, D.P., Weintraub, M.N., Grandy, A.S., Lauber, C.L., Rinkes, Z.L., Allison, S.D., 2011. Optimization of hydrolytic and oxidative enzyme methods for ecosystem studies. Soil Biol. Biochem. 43, 1387-1397. https://doi.org/10.1016/j.soilbio.2011.03.017

Saiya-Cork, K.R., Sinsabaugh, R.L., Zak, D.R., 2002. The effects of long term nitrogen deposition on extracellular enzyme activity in an Acer saccharum forest soil. Soil Biol. Biochem. 34, 1309-1315. https://doi.org/10.1016/S0038-0717(02)00074-3

**Table S1** Basic physical properties of abandoned rare-earth mine land soil and sewage sludge.

| Properties | | Rare earth mine soil | Composted  sewage sludge | Dewatered  sewage sludge |
| --- | --- | --- | --- | --- |
| Bulk density (g·cm-3) | | 1.26 | 0.78 | 0.82 |
| The mass water content (%) | | 12.31 | 38.69 | 58.64 |
| Aggregate content  (%) | >2 mm | 5.54 | 36.23 | 34.41 |
| 0.5-2 mm | 21.10 | 6.64 | 3.51 |
| 0.25-0.5 mm | 8.06 | 0.67 | 0.18 |
| <0.25 mm | 14.42 | 4.18 | 5.07 |

**Table S2** Basic chemical properties of abandoned rare-earth mine land soil and sewage sludge. CJ/T 362-2011, Urban Construction Industry Standard of the People 's Republic of China “Disposal of sludge from municipal wastewater treatment plant: Quality of sludge used in forestland”. SOM, soil organic matter; N, nitrogen; P, phosphorus; K, potassium; Cr, chromium; Cd, cadmium; Cu, copper; Zn, zinc; Ni, nickel; Pb, lead; ns, below the detection limit.

| Properties | Rare earth mine soil | | Composted  sewage sludge | | Dewatered  sewage sludge | | CJ/T 362-2011 | |
| --- | --- | --- | --- | --- | --- | --- | --- | --- |
| pH | 5.47 | 5.23 | | 5.1 | |  | |
| SOM (g·kg-1) | 4.78 | 239.24 | | 299.00 | |  | |
| Total N (g·kg-1) | 0.05 | 13.70 | | 16.47 | |  | |
| Total P (g·kg-1) | 0.09 | 21.27 | | 21.88 | |  | |
| Total K (g·kg-1) | 33.80 | 7.80 | | 6.15 | |  | |
| Available N (mg·kg-1) | 37.93 | 550.99 | | 1520.69 | |  | |
| Available P (mg·kg-1) | 1.35 | 21.16 | | 27.45 | |  | |
| Available K (mg·kg-1) | 141.16 | 1183.86 | | 1826.15 | |  | |
| Total Cr (mg·kg-1) | 48.43 | 82.77 | | 40.99 | | <1000 | |
| Total Cd (mg·kg-1) | 0.04 | 1.05 | | 1.38 | | <20.00 | |
| Total Cu (mg·kg-1) | 19.07 | 196.65 | | 1304.16 | | <1500 | |
| Total Zn (mg·kg-1) | 57.63 | 380.72 | | 942.16 | | <3000 | |
| Total Ni (mg·kg-1) | 1.21 | 48.77 | | 155.57 | | <200 | |
| Total Pb (mg·kg-1) | 44.39 | 42.86 | | 66.99 | | <1000 | |
| DTPA-Cr (mg·kg-1) | 0.08 | 1.82 | | 1.21 | |  | |
| DTPA-Cd (mg·kg-1) | **BDL** | **BDL** | | **BDL** | |  | |
| DTPA-Cu (mg·kg-1) | 0.03 | 28.07 | | 264.83 | |  | |
| DTPA-Zn (mg·kg-1) | 0.07 | 29.88 | | 92.54 | |  | |
| DTPA-Ni (mg·kg-1) | 0.04 | 2.82 | | 53.81 | |  | |
| DTPA-Pb (mg·kg-1) | 1.14 | 1.35 | | 1.58 | |  | |

**Table S3** Comprehensive evaluation of soil aggregate stability based on the membership function method.

| Treatment | Mean subordinate function | | | | | | MFSV | Rank |
| --- | --- | --- | --- | --- | --- | --- | --- | --- |
| MSMA | WSMA | MWD | GMD | Dm | PAD |
| M | 0.00 | 0.00 | 0.00 | 0.00 | 0.00 | 0.00 | 0.0000 | 14 |
| M-N | 0.65 | 0.63 | 0.36 | 0.33 | 0.39 | 0.68 | 0.5068 | 10 |
| M-H | 0.58 | 0.86 | 0.56 | 0.54 | 0.41 | 0.59 | 0.5900 | 8 |
| M-A | 0.56 | 0.60 | 0.44 | 0.41 | 0.29 | 0.44 | 0.4567 | 12 |
| M-N×H | 0.42 | 0.24 | 0.17 | 0.15 | 0.17 | 0.16 | 0.2176 | 13 |
| M-N×A | 1.00 | 0.47 | 0.39 | 0.33 | 0.32 | 0.29 | 0.4655 | 11 |
| M-H×A | 0.81 | 0.70 | 0.64 | 0.62 | 0.39 | 0.50 | 0.6089 | 7 |
| S | 0.50 | 0.56 | 0.58 | 0.51 | 0.39 | 0.57 | 0.5189 | 9 |
| S-N | 0.70 | 0.79 | 0.89 | 0.87 | 0.59 | 0.75 | 0.7645 | 3 |
| S-H | 0.96 | 1.00 | 1.00 | 1.00 | 1.00 | 1.00 | 0.9927 | 1 |
| S-A | 0.74 | 0.73 | 0.83 | 0.69 | 0.63 | 0.71 | 0.7223 | 4 |
| S-N×H | 0.63 | 0.83 | 0.69 | 0.72 | 0.66 | 0.52 | 0.6757 | 6 |
| S-N×A | 0.61 | 0.86 | 0.69 | 0.69 | 0.63 | 0.83 | 0.7217 | 5 |
| S-H×A | 0.99 | 0.88 | 0.72 | 0.72 | 0.71 | 0.90 | 0.8199 | 2 |

Note：MSMA, WSMA, MWD, and GMD were positively normalized, whereas Dm and PAD were reverse-normalized because lower values indicate higher aggregate stability. MFSV was calculated as the mean of the normalized values. Higher MFSV values indicate greater aggregate stability.

**Table S4** Soil carbon fractions in bulk soil under different sludge–plant treatments.

| Treatment | LFOC (g kg⁻¹) | POC (g kg⁻¹) | MAOC (g kg⁻¹) |
| --- | --- | --- | --- |
| M | 2.64 ± 0.13 d | 1.21 ± 0.19 fg | 2.12 ± 0.16 de |
| M-N | 2.97 ± 0.18 d | 1.28 ± 0.11 fg | 1.90 ± 0.25 ef |
| M-H | 3.67 ± 0.34 d | 0.85 ± 0.13 g | 1.04 ± 0.05 f |
| M-A | 1.96 ± 0.30 d | 1.61 ± 0.15 fg | 3.09 ± 0.11 abcd |
| M-N×H | 2.67 ± 0.42 d | 1.95 ± 0.29 efg | 2.44 ± 0.35 cde |
| M-N×A | 2.06 ± 0.13 d | 2.03 ± 0.19 ef | 2.50 ± 0.25 bcde |
| M-H×A | 2.12 ± 0.12 d | 1.83 ± 0.07 efg | 2.23 ± 0.17 de |
| S | 9.36 ± 1.28 a | 3.41 ± 0.33 d | 3.85 ± 0.23 a |
| S-N | 9.86 ± 0.56 a | 2.83 ± 0.20 de | 3.18 ± 0.39 abcd |
| S-H | 1.79 ± 0.22 d | 6.96 ± 0.56 a | 3.85 ± 0.61 a |
| S-A | 9.00 ± 1.91 ab | 5.90 ± 0.50 b | 4.06 ± 0.55 a |
| S-N×H | 6.87 ± 1.50 bc | 4.78 ± 0.67 c | 3.55 ± 0.53 ab |
| S-N×A | 6.18 ± 0.21 c | 3.46 ± 0.19 d | 3.76 ± 0.27 a |
| S-H×A | 9.74 ± 0.12 a | 5.52 ± 0.67 bc | 3.31 ± 0.09 abc |
| Source of Variation |  |  |  |
| S | <0.001*** | <0.001*** | <0.001*** |
| P | <0.001*** | <0.001*** | 0.031* |
| S×P | <0.001*** | <0.001*** | 0.116NS |

Note: LFOC, light-fraction organic carbon; POC, particulate organic carbon; MAOC, mineral-associated organic carbon. M, mine soil without sludge addition; S, sludge-amended soil; N, *N. cadamba*; H, *H. arboricola*; A, *A. amazonica*. “×” indicates mixed planting. Values are means ± SE (n = 4). Different lowercase letters within the same column indicate significant differences among treatments according to Duncan’s test at P < 0.05. In the two-way ANOVA, “S” represents sludge application, “P” represents plant cultivation, and “S×P” represents their interaction. “NS” indicates no significant effect, while “*”, “**”, and “***” indicate significance at P < 0.05, P < 0.01, and P < 0.001, respectively. Only bulk-soil values are shown.

**Table S5** The effects of sludge addition and planting pattern on aboveground and belowground biomass.

| Species | Treatments | Aboveground biomass (g) | Belowground biomass（g） |
| --- | --- | --- | --- |
| *N. cadamba* | M-N | 3.22±0.38b | 1.97±0.20b |
| M-N×H | 4.02±1.48b | 1.66±0.22b |
| M-N×A | 1.88±0.41b | 1.67±0.38b |
| S-N | 31.50±8.68a | 9.42±1.85a |
| S-N×H | 29.42±2.57a | 8.26±0.78a |
| S-N×A | 35.55±3.19a | 10.15±1.46a |
| *H. arboricola* | M-H | 4.76±0.33b | 2.23±0.92b |
| M-N×H | 3.39±0.60b | 2.14±0.44b |
| M-H×A | 2.85±0.64b | 2.75±0.55b |
| S-H | 10.27±2.12a | 4.04±0.94ab |
| S-N×H | 5.64±0.81b | 1.96±0.19b |
| S-H×A | 11.93±1.66a | 4.95±0.61a |
| *A. amazonica* | M-A | 2.34±0.08b | 2.85±0.26b |
| M-N×A | 0.95±0.32b | 1.35±0.23b |
| M-H×A | 1.07±0.21b | 1.77±0.25b |
| S-A | 6.64±0.49a | 3.10±0.39a |
| S-N×A | 1.09±0.54b | 0.75±0.24b |
| S-H×A | 5.29±0.86a | 2.50±0.47a |

Note: M, mine soil without sludge addition; S, sludge-amended soil; N, *N. cadamba*; H, *H. arboricola*; A, *A. amazonica*. “×” indicates mixed planting. Values areValues are means ± SE (n = 4).. Different lowercase letters within the same species indicate significant differences among treatments for the same biomass index (Duncan test, *P* < 0.05).

**Table S6** Effects of sludge addition and planting patterns on root morphological traits.

| Species | Treatments | RL(cm) | RS（cm2） | RV（cm3） | RD（mm） |
| --- | --- | --- | --- | --- | --- |
| *N. cadamba* | M-N | 4465.13±782.71c | 549.09±51.26b | 5.54±0.30b | 0.41±0.04c |
| M-N×H | 2980.39±699.92c | 397.44±74.46b | 4.32±0.68b | 0.45±0.04c |
| M-N×A | 2907.53±645.07c | 394.70±76.53b | 4.28±0.71b | 0.44±0.02c |
| S-N | 14360.53±3925.54a | 2369.16±542.02a | 32.40±7.56a | 0.55±0.05bc |
| S-N×H | 7915.61±2088.14bc | 1785.37±396.39a | 33.92±7.84a | 0.74±0.07a |
| S-N×A | 10908.37±1442.11ab | 2185.10±105.04a | 36.62±3.67a | 0.66±0.07ab |
| *H. arboricola* | M-H | 1265.30±338.90a | 256.53±77.62a | 4.53±1.82a | 0.68±0.11c |
| M-N×H | 1309.72±546.86a | 280.35±99.58a | 4.85±1.45a | 0.74±0.05bc |
| M-H×A | 979.95±284.51a | 223.54±48.22a | 4.30±0.81a | 0.80±0.12bc |
| S-H | 1087.42±456.36a | 393.96±181.83a | 11.50±5.76a | 1.12±0.08ab |
| S-N×H | 540.01±219.52a | 172.44±52.10a | 4.68±0.79a | 1.27±0.23a |
| S-H×A | 1668.37±517.06a | 466.43±86.46a | 10.90±1.30a | 0.97±0.11abc |
| *A.× amazonica* | M-A | 3677.73±883.66a | 521.89±115.86a | 5.94±1.27a | 0.46±0.02d |
| M-N×A | 1532.67±633.67bc | 232.49±61.62bc | 3.17±0.60b | 0.62±0.09bc |
| M-H×A | 923.70±105.16bc | 171.06±15.57c | 2.53±0.19b | 0.59±0.02bcd |
| S-A | 3308.77±266.86a | 521.52±41.35a | 6.55±0.52a | 0.50±0.00cd |
| S-N×A | 236.44±59.67c | 76.09±17.05c | 1.96±0.38b | 1.06±0.04a |
| S-H×A | 1781.14±302.03b | 358.04±44.05ab | 5.80±0.42a | 0.67±0.05b |

Note: RL, root length; RS, root surface area; RV, root volume; RD, root diameter. M, mine soil without sludge addition; S, sludge-amended soil; N, *N. cadamba*; H, *H. arboricola*; A, *A. amazonica*. “×” indicates mixed planting. Values are means ± SE (n = 4).. Different lowercase letters within the same species indicate significant differences among treatments for the same root trait (Duncan test, *P* < 0.05).

**Table S7** Cu, Zn, and Ni concentrations in aboveground and belowground tissues under different planting treatments.

| Treatment | Cu（mg·kg-1） | | Zn（mg·kg-1） | | Ni（mg·kg-1） | |
| --- | --- | --- | --- | --- | --- | --- |
| Aboveground | Belowground | Aboveground | Belowground | Aboveground | Belowground |
| M-N | 8.72±1.55cd | 7.18±1.63d | 21.44±3.37fg | 38.13±1.01gh | 0.98±0.17e | 1.05±0.17c |
| M-A | 6.71±1.99defg | 6.53±0.69d | 62.70±5.17d | 12.41±0.61h | 0.89±0.30e | 0.68±0.05c |
| M-H | 7.63±1.01cde | 7.97±0.84d | 16.06±2.70g | 121.69±15.10cd | 0.71±0.03e | 1.35±0.20c |
| M-N×H | 7.24±1.01cdef | 10.00±0.57d | 68.63±7.85d | 49.74±4.20fgh | 0.84±0.19e | 1.49±0.36c |
| M-N×A | 3.08±0.51g | 15.87±1.50d | 26.56±3.81efg | 94.87±7.30de | 0.62±0.09e | 1.79±0.20c |
| M-H×A | 4.12±0.47efg | 12.61±1.20d | 70.79±8.17d | 84.17±4.15de | 1.35±0.20e | 1.18±0.01c |
| S-N | 11.01±0.85bc | 80.74±17.27ab | 52.40±6.48de | 209.64±31.51b | 7.03±0.91cd | 50.67±10.86a |
| S-H | 30.59±1.77a | 48.65±3.79c | 218.60±20.64a | 68.36±7.92def | 20.15±2.26a | 33.84±2.07b |
| S-A | 3.52±0.21fg | 100.00±11.18a | 46.46±5.43def | 265.17±13.24a | 4.02±0.33de | 55.50±5.55a |
| S-N×H | 32.61±0.66a | 65.80±2.50bc | 172.57±15.08b | 124.24±8.23cd | 17.56±2.07a | 43.79±2.86ab |
| S-N×A | 14.25±0.77b | 59.48±13.94bc | 97.32±4.53c | 209.74±14.82b | 10.93±2.10b | 49.33±5.32a |
| S-H×A | 14.71±2.39b | 85.04±15.49ab | 121.09±3.08c | 160.97±16.50c | 8.97±0.61bc | 53.39±6.79a |

Note: Cu, copper; Zn, zinc; Ni, nickel. M, mine soil without sludge addition; S, sludge-amended soil; N, *N. cadamba*; H, *H. arboricola*; A, *A. amazonica*. “×” indicates mixed planting. Values are means ± SE (n = 4). Different lowercase letters within the same column indicate significant differences among treatments (Duncan test, P < 0.05).For mixed planting treatments, plant tissues of the two species within the same pot were pooled by organ before heavy metal analysis.

**Table S8** Translocation factors of Cu, Zn, and Ni under different treatments.

| Metals | M | M-N | M-H | M-A | M-N×H | M-N×A | M-H×A | S | S-N | S-H | S-A | S-N×H | S-N×A | S-H×A |
| --- | --- | --- | --- | --- | --- | --- | --- | --- | --- | --- | --- | --- | --- | --- |
| Cu | - | 0.45 | 0.58 | 0.20 | 0.18 | 0.15 | 0.21 | - | 0.34 | 0.75 | 0.22 | 0.97 | 0.78 | 0.38 |
| Zn | - | 0..31 | 8.55 | 0.30 | 1.29 | 0.58 | 0.64 | - | 0.47 | 1.01 | 0.26 | 0.86 | 0.43 | 0.77 |
| Ni | - | 0.43 | 2.81 | 0.50 | 1.05 | 0.35 | 0.72 | - | 1.89 | 2.15 | 1.29 | 3.25 | 6.67 | 3.43 |

Note: M, mine soil without sludge addition; S, sludge-amended soil; N, *N. cadamba*; H, *H. arboricola*; A, *A. amazonica.* “×” indicates mixed planting. “–” indicates not applicable.

**Table S9** Bioconcentration factors of Cu, Zn, and Ni under different treatments.

| Metals | M-N | M-H | M-A | M-N×H | M-N×A | M-H×A | S-N | S-H | S-A | S-N×H | S-N×A | S-H×A |
| --- | --- | --- | --- | --- | --- | --- | --- | --- | --- | --- | --- | --- |
| Cu | 6.50 | 8.62 | 9.37 | 3.42 | 13.58 | 15.86 | 1.89 | 1.86 | 4.23 | 1.93 | 1.89 | 2.46 |
| Zn | 0.69 | 0.72 | 2.24 | 0.76 | 2.21 | 2.19 | 1.14 | 1.21 | 4.05 | 1.44 | 3.04 | 3.13 |
| Ni | 0.62 | 0.48 | 0.56 | 0.61 | 0.84 | 0.77 | 2.14 | 2.63 | 4.99 | 2.74 | 2.54 | 3.06 |

Note: Cu, copper; Zn, zinc; Ni, nickel. M, mine soil without sludge addition; S, sludge-amended soil; N, *N. cadamba*; H, *H. arboricola*; A, *A. amazonica.* “×” indicates mixed planting. “–” indicates not applicable.

**Table S10.** Soil heavy metal pollution assessment indices under different treatments.

| Treatment | Ei | | | *RI* | |
| --- | --- | --- | --- | --- | --- |
| Cu | Zn | Ni |
| M-N | 0.83 | 1.14 | 0.82 | 2.79 |
| M-H | 0.23 | 0.86 | 0.51 | 1.60 |
| M-A | 0.34 | 0.84 | 0.55 | 1.72 |
| M-N×H | 0.23 | 1.00 | 0.64 | 1.88 |
| M-N×A | 0.58 | 1.12 | 0.77 | 2.46 |
| M-H×A | 0.29 | 0.79 | 0.63 | 1.72 |
| S-N | 0.35 | 0.97 | 0.62 | 1.94 |
| S-H | 12.70 | 1.95 | 2.62 | 17.27 |
| S-A | 10.90 | 1.37 | 2.08 | 14.35 |
| S-N×H | 11.57 | 1.39 | 1.59 | 14.56 |
| S-N×A | 7.59 | 0.99 | 1.87 | 10.45 |
| S-H×A | 9.83 | 1.16 | 1.29 | 12.28 |

Note: Cu, copper; Zn, zinc; Ni, nickel; Eᵢ, single-factor ecological risk index; RI, comprehensive potential ecological risk index. M, mine soil without sludge addition; S, sludge-amended soil; N, N. cadamba; H, H. arboricola; A, A. × amazonica. “×” indicates mixed planting.

**Fig. S1** Changes in enzymes content.


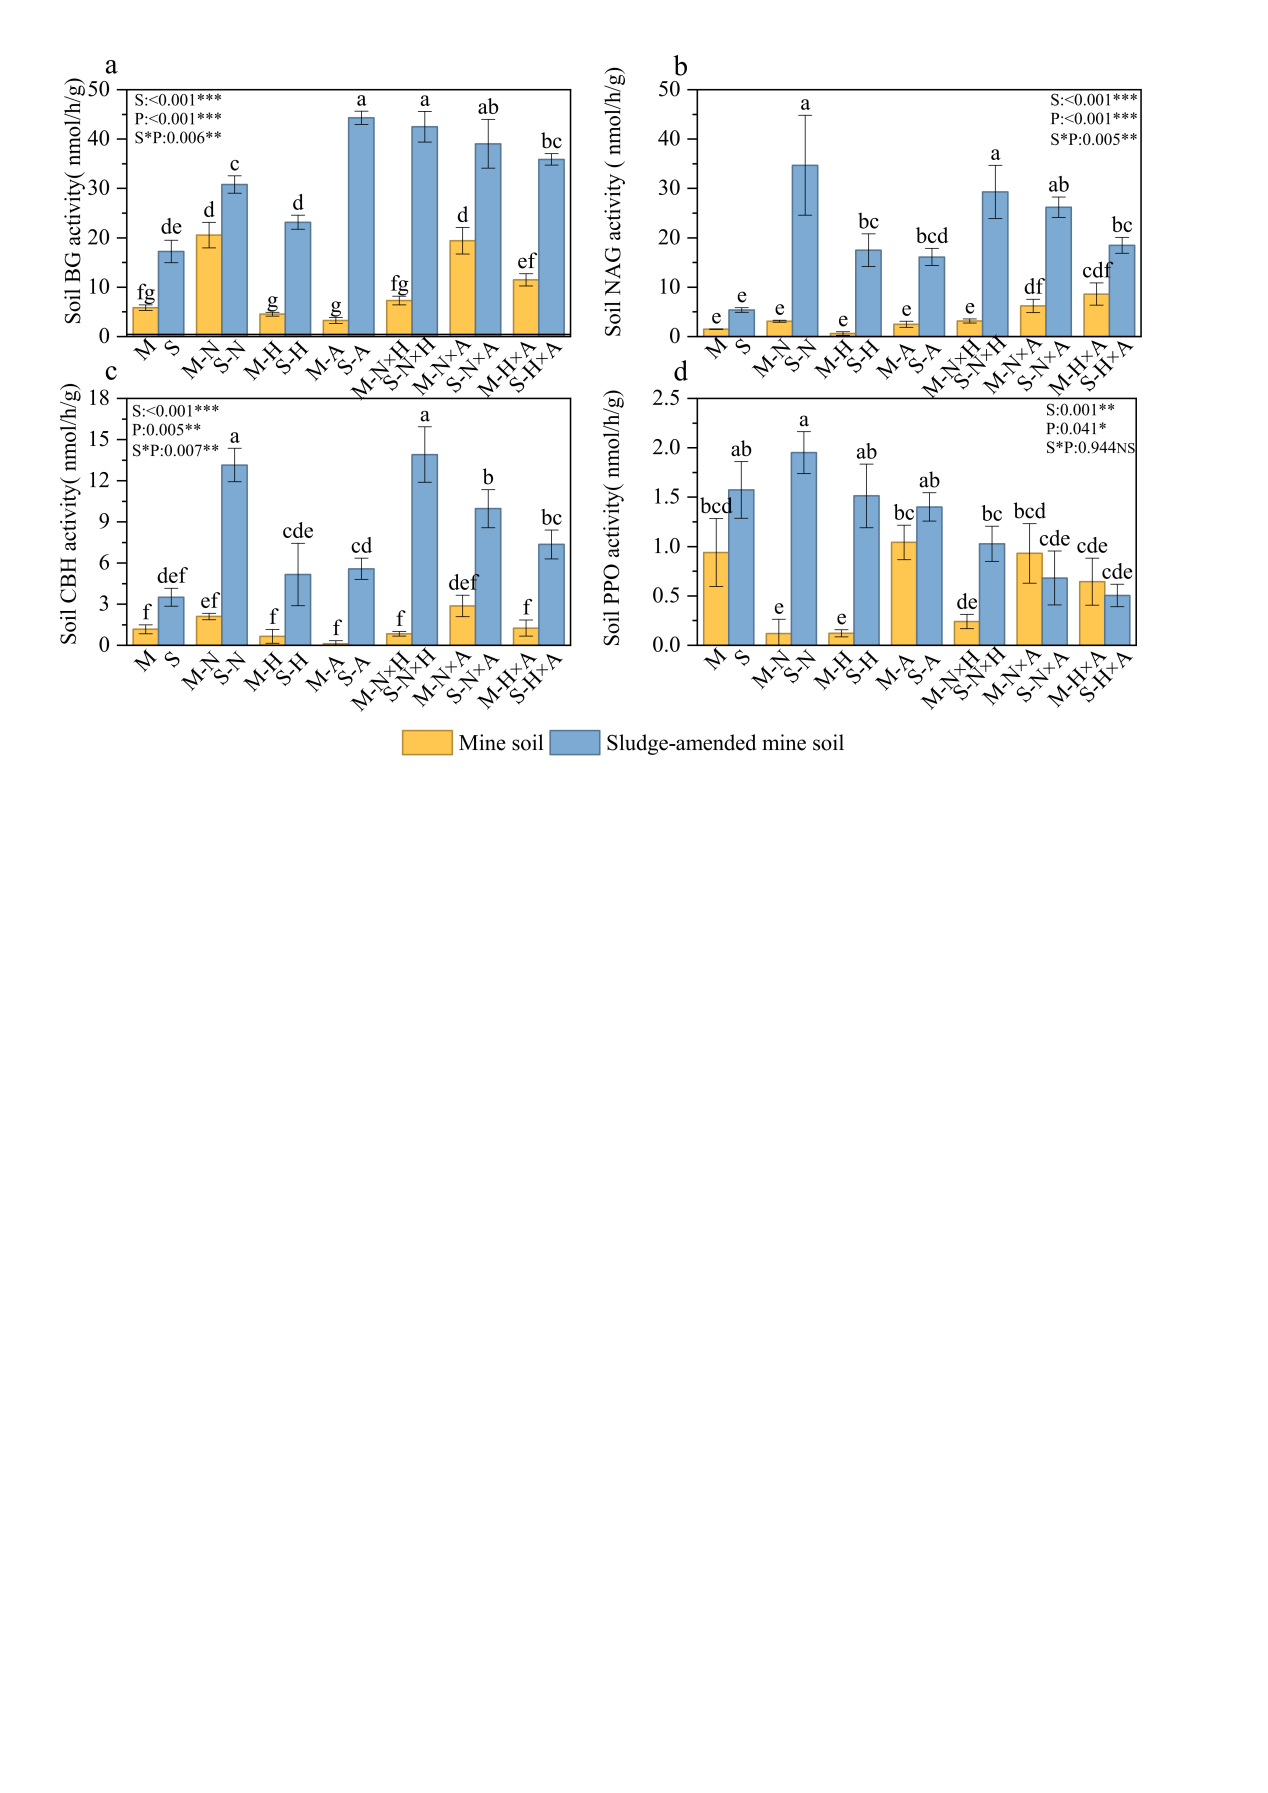

Supplement: Supplementary file 1 [file a73d1bf3998f9e26f9645a97.docx]
